# Supplementary material for: Malaria vectors in South America: current and future scenarios
Source: PubMed Central journal article supplement (PMC4539674; doi:10.1186/s13071-015-1038-4), 2015-08-19
Supplement: 13071_2015_1038_MOESM6_ESM.pdf [file 13071_2015_1038_MOESM6_ESM.pdf]

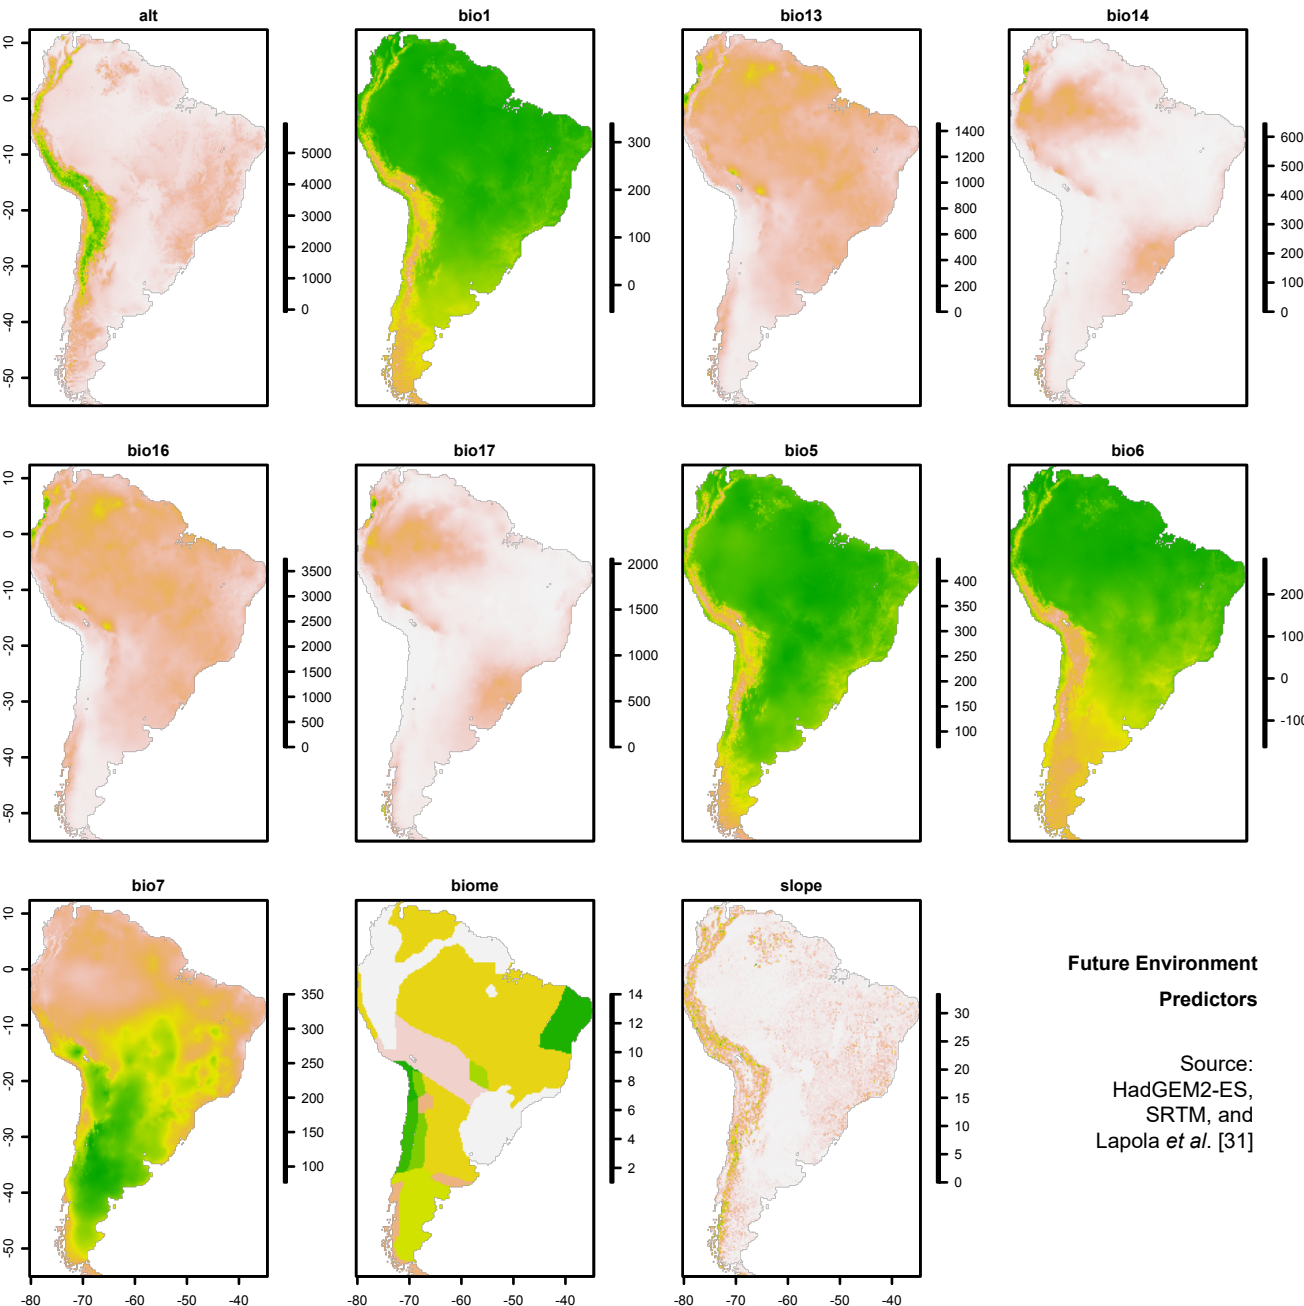

**Future Environment  
Predictors**

Source:  
HadGEM2-ES,  
SRTM, and  
Lapola *et al.* [31]
